# Supplementary material for: Organosulfates in Atlanta, Georgia: anthropogenic influences on biogenic secondary organic aerosol formation
Source: Copernicus journal article supplement (doi:10.5194/acp-19-3191-2019), 2019-03-12
Supplement: Supplementary file 1 [file acp-19-3191-2019-supplement.zip]

**Table S1.** Intercorrelations of organosulfates in Atlanta, GA during August 2015 (n = 26). All shaded cells indicate correlations that are positive and significant at 0.05 level. None of the organosulfates showed negative correlations that are significant at 0.05 level.

|                  | 137                                                        | 139                                                        | 151                                                        | <sup>a</sup> 153                                           | 155                                                        | <sup>b</sup> 155                                           | 165                                                        | 167                                                        | <sup>c</sup> 169                                           | 183                                                        | 195                                                        | 197                                                        | <sup>d</sup> 199                                           | 199                                                         | 209                                                        | 211                                                        | 213                                                        | <sup>e</sup> 215                                            | 223                                                         | 237                                                        | 239                                                         | 242                                                         | 251                                                         | 253                                                         | 260                                                          | 265                                                          | 274                                                          | 279                                                          | 281                                                          | 294                                                           | 296                                                          |  |
|------------------|------------------------------------------------------------|------------------------------------------------------------|------------------------------------------------------------|------------------------------------------------------------|------------------------------------------------------------|------------------------------------------------------------|------------------------------------------------------------|------------------------------------------------------------|------------------------------------------------------------|------------------------------------------------------------|------------------------------------------------------------|------------------------------------------------------------|------------------------------------------------------------|-------------------------------------------------------------|------------------------------------------------------------|------------------------------------------------------------|------------------------------------------------------------|-------------------------------------------------------------|-------------------------------------------------------------|------------------------------------------------------------|-------------------------------------------------------------|-------------------------------------------------------------|-------------------------------------------------------------|-------------------------------------------------------------|--------------------------------------------------------------|--------------------------------------------------------------|--------------------------------------------------------------|--------------------------------------------------------------|--------------------------------------------------------------|---------------------------------------------------------------|--------------------------------------------------------------|--|
|                  | C <sub>3</sub> H <sub>5</sub> SO <sub>4</sub> <sup>-</sup> | C <sub>2</sub> H <sub>3</sub> SO <sub>5</sub> <sup>-</sup> | C <sub>4</sub> H <sub>7</sub> SO <sub>4</sub> <sup>-</sup> | C <sub>3</sub> H <sub>5</sub> SO <sub>5</sub> <sup>-</sup> | C <sub>3</sub> H <sub>7</sub> SO <sub>5</sub> <sup>-</sup> | C <sub>2</sub> H <sub>3</sub> SO <sub>6</sub> <sup>-</sup> | C <sub>4</sub> H <sub>5</sub> SO <sub>5</sub> <sup>-</sup> | C <sub>4</sub> H <sub>7</sub> SO <sub>5</sub> <sup>-</sup> | C <sub>3</sub> H <sub>5</sub> SO <sub>6</sub> <sup>-</sup> | C <sub>4</sub> H <sub>7</sub> SO <sub>6</sub> <sup>-</sup> | C <sub>5</sub> H <sub>9</sub> SO <sub>6</sub> <sup>-</sup> | C <sub>5</sub> H <sub>9</sub> SO <sub>6</sub> <sup>-</sup> | C <sub>4</sub> H <sub>7</sub> SO <sub>7</sub> <sup>-</sup> | C <sub>5</sub> H <sub>11</sub> SO <sub>6</sub> <sup>-</sup> | C <sub>6</sub> H <sub>9</sub> SO <sub>6</sub> <sup>-</sup> | C <sub>5</sub> H <sub>7</sub> SO <sub>7</sub> <sup>-</sup> | C <sub>5</sub> H <sub>9</sub> SO <sub>7</sub> <sup>-</sup> | C <sub>5</sub> H <sub>11</sub> SO <sub>7</sub> <sup>-</sup> | C <sub>7</sub> H <sub>11</sub> SO <sub>6</sub> <sup>-</sup> | C <sub>7</sub> H <sub>9</sub> SO <sub>7</sub> <sup>-</sup> | C <sub>7</sub> H <sub>11</sub> SO <sub>7</sub> <sup>-</sup> | C <sub>5</sub> H <sub>8</sub> NSO <sub>8</sub> <sup>-</sup> | C <sub>9</sub> H <sub>15</sub> SO <sub>6</sub> <sup>-</sup> | C <sub>8</sub> H <sub>13</sub> SO <sub>7</sub> <sup>-</sup> | C <sub>5</sub> H <sub>10</sub> NSO <sub>9</sub> <sup>-</sup> | C <sub>12</sub> H <sub>25</sub> SO <sub>4</sub> <sup>-</sup> | C <sub>5</sub> H <sub>8</sub> NSO <sub>10</sub> <sup>-</sup> | C <sub>10</sub> H <sub>15</sub> SO <sub>7</sub> <sup>-</sup> | C <sub>10</sub> H <sub>17</sub> SO <sub>7</sub> <sup>-</sup> | C <sub>10</sub> H <sub>16</sub> NSO <sub>7</sub> <sup>-</sup> | C <sub>9</sub> H <sub>14</sub> NSO <sub>8</sub> <sup>-</sup> |  |
| 139              |                                                            |                                                            |                                                            |                                                            |                                                            |                                                            |                                                            |                                                            |                                                            |                                                            |                                                            |                                                            |                                                            |                                                             |                                                            |                                                            |                                                            |                                                             |                                                             |                                                            |                                                             |                                                             |                                                             |                                                             |                                                              |                                                              |                                                              |                                                              |                                                              |                                                               |                                                              |  |
| 151              |                                                            |                                                            |                                                            |                                                            |                                                            |                                                            |                                                            |                                                            |                                                            |                                                            |                                                            |                                                            |                                                            |                                                             |                                                            |                                                            |                                                            |                                                             |                                                             |                                                            |                                                             |                                                             |                                                             |                                                             |                                                              |                                                              |                                                              |                                                              |                                                              |                                                               |                                                              |  |
| <sup>a</sup> 153 |                                                            |                                                            |                                                            |                                                            |                                                            |                                                            |                                                            |                                                            |                                                            |                                                            |                                                            |                                                            |                                                            |                                                             |                                                            |                                                            |                                                            |                                                             |                                                             |                                                            |                                                             |                                                             |                                                             |                                                             |                                                              |                                                              |                                                              |                                                              |                                                              |                                                               |                                                              |  |
| 155              |                                                            |                                                            |                                                            |                                                            |                                                            |                                                            |                                                            |                                                            |                                                            |                                                            |                                                            |                                                            |                                                            |                                                             |                                                            |                                                            |                                                            |                                                             |                                                             |                                                            |                                                             |                                                             |                                                             |                                                             |                                                              |                                                              |                                                              |                                                              |                                                              |                                                               |                                                              |  |
| <sup>b</sup> 155 |                                                            |                                                            |                                                            |                                                            |                                                            |                                                            |                                                            |                                                            |                                                            |                                                            |                                                            |                                                            |                                                            |                                                             |                                                            |                                                            |                                                            |                                                             |                                                             |                                                            |                                                             |                                                             |                                                             |                                                             |                                                              |                                                              |                                                              |                                                              |                                                              |                                                               |                                                              |  |
| 165              |                                                            |                                                            |                                                            |                                                            |                                                            |                                                            |                                                            |                                                            |                                                            |                                                            |                                                            |                                                            |                                                            |                                                             |                                                            |                                                            |                                                            |                                                             |                                                             |                                                            |                                                             |                                                             |                                                             |                                                             |                                                              |                                                              |                                                              |                                                              |                                                              |                                                               |                                                              |  |
| 167              |                                                            |                                                            |                                                            |                                                            |                                                            |                                                            |                                                            |                                                            |                                                            |                                                            |                                                            |                                                            |                                                            |                                                             |                                                            |                                                            |                                                            |                                                             |                                                             |                                                            |                                                             |                                                             |                                                             |                                                             |                                                              |                                                              |                                                              |                                                              |                                                              |                                                               |                                                              |  |
| <sup>c</sup> 169 |                                                            |                                                            |                                                            |                                                            |                                                            |                                                            |                                                            |                                                            |                                                            |                                                            |                                                            |                                                            |                                                            |                                                             |                                                            |                                                            |                                                            |                                                             |                                                             |                                                            |                                                             |                                                             |                                                             |                                                             |                                                              |                                                              |                                                              |                                                              |                                                              |                                                               |                                                              |  |
| 183              |                                                            |                                                            |                                                            |                                                            |                                                            |                                                            |                                                            |                                                            |                                                            |                                                            |                                                            |                                                            |                                                            |                                                             |                                                            |                                                            |                                                            |                                                             |                                                             |                                                            |                                                             |                                                             |                                                             |                                                             |                                                              |                                                              |                                                              |                                                              |                                                              |                                                               |                                                              |  |
| 195              |                                                            |                                                            |                                                            |                                                            |                                                            |                                                            |                                                            |                                                            |                                                            |                                                            |                                                            |                                                            |                                                            |                                                             |                                                            |                                                            |                                                            |                                                             |                                                             |                                                            |                                                             |                                                             |                                                             |                                                             |                                                              |                                                              |                                                              |                                                              |                                                              |                                                               |                                                              |  |
| 197              |                                                            |                                                            |                                                            |                                                            |                                                            |                                                            |                                                            |                                                            |                                                            |                                                            |                                                            |                                                            |                                                            |                                                             |                                                            |                                                            |                                                            |                                                             |                                                             |                                                            |                                                             |                                                             |                                                             |                                                             |                                                              |                                                              |                                                              |                                                              |                                                              |                                                               |                                                              |  |
| <sup>d</sup> 199 |                                                            |                                                            |                                                            |                                                            |                                                            |                                                            |                                                            |                                                            |                                                            |                                                            |                                                            |                                                            |                                                            |                                                             |                                                            |                                                            |                                                            |                                                             |                                                             |                                                            |                                                             |                                                             |                                                             |                                                             |                                                              |                                                              |                                                              |                                                              |                                                              |                                                               |                                                              |  |
| 199              |                                                            |                                                            |                                                            |                                                            |                                                            |                                                            |                                                            |                                                            |                                                            |                                                            |                                                            |                                                            |                                                            |                                                             |                                                            |                                                            |                                                            |                                                             |                                                             |                                                            |                                                             |                                                             |                                                             |                                                             |                                                              |                                                              |                                                              |                                                              |                                                              |                                                               |                                                              |  |
| 209              |                                                            |                                                            |                                                            |                                                            |                                                            |                                                            |                                                            |                                                            |                                                            |                                                            |                                                            |                                                            |                                                            |                                                             |                                                            |                                                            |                                                            |                                                             |                                                             |                                                            |                                                             |                                                             |                                                             |                                                             |                                                              |                                                              |                                                              |                                                              |                                                              |                                                               |                                                              |  |
| 211              |                                                            |                                                            |                                                            |                                                            |                                                            |                                                            |                                                            |                                                            |                                                            |                                                            |                                                            |                                                            |                                                            |                                                             |                                                            |                                                            |                                                            |                                                             |                                                             |                                                            |                                                             |                                                             |                                                             |                                                             |                                                              |                                                              |                                                              |                                                              |                                                              |                                                               |                                                              |  |
| 213              |                                                            |                                                            |                                                            |                                                            |                                                            |                                                            |                                                            |                                                            |                                                            |                                                            |                                                            |                                                            |                                                            |                                                             |                                                            |                                                            |                                                            |                                                             |                                                             |                                                            |                                                             |                                                             |                                                             |                                                             |                                                              |                                                              |                                                              |                                                              |                                                              |                                                               |                                                              |  |
| <sup>e</sup> 215 |                                                            |                                                            |                                                            |                                                            |                                                            |                                                            |                                                            |                                                            |                                                            |                                                            |                                                            |                                                            |                                                            |                                                             |                                                            |                                                            |                                                            |                                                             |                                                             |                                                            |                                                             |                                                             |                                                             |                                                             |                                                              |                                                              |                                                              |                                                              |                                                              |                                                               |                                                              |  |
| 223              |                                                            |                                                            |                                                            |                                                            |                                                            |                                                            |                                                            |                                                            |                                                            |                                                            |                                                            |                                                            |                                                            |                                                             |                                                            |                                                            |                                                            |                                                             |                                                             |                                                            |                                                             |                                                             |                                                             |                                                             |                                                              |                                                              |                                                              |                                                              |                                                              |                                                               |                                                              |  |
| 237              |                                                            |                                                            |                                                            |                                                            |                                                            |                                                            |                                                            |                                                            |                                                            |                                                            |                                                            |                                                            |                                                            |                                                             |                                                            |                                                            |                                                            |                                                             |                                                             |                                                            |                                                             |                                                             |                                                             |                                                             |                                                              |                                                              |                                                              |                                                              |                                                              |                                                               |                                                              |  |
| 239              |                                                            |                                                            |                                                            |                                                            |                                                            |                                                            |                                                            |                                                            |                                                            |                                                            |                                                            |                                                            |                                                            |                                                             |                                                            |                                                            |                                                            |                                                             |                                                             |                                                            |                                                             |                                                             |                                                             |                                                             |                                                              |                                                              |                                                              |                                                              |                                                              |                                                               |                                                              |  |
| 242              |                                                            |                                                            |                                                            |                                                            |                                                            |                                                            |                                                            |                                                            |                                                            |                                                            |                                                            |                                                            |                                                            |                                                             |                                                            |                                                            |                                                            |                                                             |                                                             |                                                            |                                                             |                                                             |                                                             |                                                             |                                                              |                                                              |                                                              |                                                              |                                                              |                                                               |                                                              |  |
| 251              |                                                            |                                                            |                                                            |                                                            |                                                            |                                                            |                                                            |                                                            |                                                            |                                                            |                                                            |                                                            |                                                            |                                                             |                                                            |                                                            |                                                            |                                                             |                                                             |                                                            |                                                             |                                                             |                                                             |                                                             |                                                              |                                                              |                                                              |                                                              |                                                              |                                                               |                                                              |  |
| 253              |                                                            |                                                            |                                                            |                                                            |                                                            |                                                            |                                                            |                                                            |                                                            |                                                            |                                                            |                                                            |                                                            |                                                             |                                                            |                                                            |                                                            |                                                             |                                                             |                                                            |                                                             |                                                             |                                                             |                                                             |                                                              |                                                              |                                                              |                                                              |                                                              |                                                               |                                                              |  |
| 260              |                                                            |                                                            |                                                            |                                                            |                                                            |                                                            |                                                            |                                                            |                                                            |                                                            |                                                            |                                                            |                                                            |                                                             |                                                            |                                                            |                                                            |                                                             |                                                             |                                                            |                                                             |                                                             |                                                             |                                                             |                                                              |                                                              |                                                              |                                                              |                                                              |                                                               |                                                              |  |
| 265              |                                                            |                                                            |                                                            |                                                            |                                                            |                                                            |                                                            |                                                            |                                                            |                                                            |                                                            |                                                            |                                                            |                                                             |                                                            |                                                            |                                                            |                                                             |                                                             |                                                            |                                                             |                                                             |                                                             |                                                             |                                                              |                                                              |                                                              |                                                              |                                                              |                                                               |                                                              |  |
| 274              |                                                            |                                                            |                                                            |                                                            |                                                            |                                                            |                                                            |                                                            |                                                            |                                                            |                                                            |                                                            |                                                            |                                                             |                                                            |                                                            |                                                            |                                                             |                                                             |                                                            |                                                             |                                                             |                                                             |                                                             |                                                              |                                                              |                                                              |                                                              |                                                              |                                                               |                                                              |  |
| 279              |                                                            |                                                            |                                                            |                                                            |                                                            |                                                            |                                                            |                                                            |                                                            |                                                            |                                                            |                                                            |                                                            |                                                             |                                                            |                                                            |                                                            |                                                             |                                                             |                                                            |                                                             |                                                             |                                                             |                                                             |                                                              |                                                              |                                                              |                                                              |                                                              |                                                               |                                                              |  |
| 281              |                                                            |                                                            |                                                            |                                                            |                                                            |                                                            |                                                            |                                                            |                                                            |                                                            |                                                            |                                                            |                                                            |                                                             |                                                            |                                                            |                                                            |                                                             |                                                             |                                                            |                                                             |                                                             |                                                             |                                                             |                                                              |                                                              |                                                              |                                                              |                                                              |                                                               |                                                              |  |
| 294              |                                                            |                                                            |                                                            |                                                            |                                                            |                                                            |                                                            |                                                            |                                                            |                                                            |                                                            |                                                            |                                                            |                                                             |                                                            |                                                            |                                                            |                                                             |                                                             |                                                            |                                                             |                                                             |                                                             |                                                             |                                                              |                                                              |                                                              |                                                              |                                                              |                                                               |                                                              |  |
| 296              |                                                            |                                                            |                                                            |                                                            |                                                            |                                                            |                                                            |                                                            |                                                            |                                                            |                                                            |                                                            |                                                            |                                                             |                                                            |                                                            |                                                            |                                                             |                                                             |                                                            |                                                             |                                                             |                                                             |                                                             |                                                              |                                                              |                                                              |                                                              |                                                              |                                                               |                                                              |  |
| <sup>f</sup> 342 |                                                            |                                                            |                                                            |                                                            |                                                            |                                                            |                                                            |                                                            |                                                            |                                                            |                                                            |                                                            |                                                            |                                                             |                                                            |                                                            |                                                            |                                                             |                                                             |                                                            |                                                             |                                                             |                                                             |                                                             |                                                              |                                                              |                                                              |                                                              |                                                              |                                                               |                                                              |  |

≥0.9 - Very strong

0.8-0.7 - Strong

0.6-0.5 - Moderate

≥0.9 - Very strong  
 0.8-0.7 - Strong  
 0.6-0.5 - Moderate

<sup>a</sup>Hydroxyacetone sulfate, <sup>b</sup>glycolic acid sulfate, <sup>c</sup>lactic acid sulfate, <sup>d</sup>2-methylglyceric acid sulfate, <sup>e</sup>methyltetrol sulfate, <sup>f</sup>C<sub>10</sub>H<sub>16</sub>NSO<sub>10</sub><sup>-</sup>

**Table S2.** Correlations of organosulfates with biogenic SOA tracers (n=26) in Atlanta, GA during August 2015; IEPOX-SOA tracers (2-methylthreitol, 2-methylerythritol, cis-2-methyl-1,3,4-trihydroxy-1-butadiene, 3-methyl-2,3,4-trihydroxy-1-butene, and trans-2-methyl-1,3,4-trihydroxy-1-butene), isoprene high-NO<sub>x</sub> SOA tracer (2-methylglyceric acid), monoterpene SOA (cis-pinonic acid), and sesquiterpene SOA tracer ( $\beta$ -caryophyllinic acid).

| <i>m/z</i>       | Chemical formula                                               | 2-Methylthreitol | 2-Methylerythritol | cis-2-Methyl-1,3,4-trihydroxy-1-butadiene | 3-Methyl-2,3,4-trihydroxy-1-butene | trans-2-Methyl-1,3,4-trihydroxy-1-butene | 2-Methylglyceric acid | cis-Pinonic acid | $\beta$ -Caryophyllinic acid |
|------------------|----------------------------------------------------------------|------------------|--------------------|-------------------------------------------|------------------------------------|------------------------------------------|-----------------------|------------------|------------------------------|
| 137              | C <sub>3</sub> H <sub>5</sub> SO <sub>4</sub> <sup>-</sup>     | .655**           | .634**             | 0.276                                     | 0.268                              | 0.279                                    | 0.256                 | 0.287            | 0.296                        |
| 139              | C <sub>2</sub> H <sub>3</sub> SO <sub>5</sub> <sup>-</sup>     | .557**           | .472*              | 0.260                                     | 0.286                              | 0.249                                    | 0.255                 | 0.258            | 0.319                        |
| 151              | C <sub>4</sub> H <sub>7</sub> SO <sub>4</sub> <sup>-</sup>     | .705**           | .690**             | 0.388                                     | 0.378                              | 0.335                                    | 0.353                 | 0.248            | 0.361                        |
| <sup>a</sup> 153 | C <sub>3</sub> H <sub>5</sub> SO <sub>5</sub> <sup>-</sup>     | .816**           | .770**             | 0.269                                     | 0.244                              | 0.278                                    | 0.371                 | 0.300            | 0.379                        |
| 155              | C <sub>3</sub> H <sub>7</sub> SO <sub>5</sub> <sup>-</sup>     | .448*            | 0.372              | 0.192                                     | 0.216                              | 0.181                                    | 0.154                 | 0.122            | 0.296                        |
| <sup>b</sup> 155 | C <sub>2</sub> H <sub>3</sub> SO <sub>6</sub> <sup>-</sup>     | 0.265            | 0.328              | .613**                                    | .585**                             | .491*                                    | 0.197                 | 0.285            | .391*                        |
| 165              | C <sub>4</sub> H <sub>5</sub> SO <sub>5</sub> <sup>-</sup>     | .768**           | .670**             | 0.089                                     | 0.091                              | 0.134                                    | 0.241                 | 0.180            | 0.190                        |
| 167              | C <sub>4</sub> H <sub>7</sub> SO <sub>5</sub> <sup>-</sup>     | .709**           | .727**             | .511**                                    | .511**                             | .515**                                   | .459*                 | .433*            | .514**                       |
| <sup>c</sup> 169 | C <sub>3</sub> H <sub>5</sub> SO <sub>6</sub> <sup>-</sup>     | .725**           | .665**             | 0.236                                     | 0.231                              | 0.252                                    | 0.259                 | 0.338            | 0.301                        |
| 183              | C <sub>4</sub> H <sub>7</sub> SO <sub>6</sub> <sup>-</sup>     | .780**           | .727**             | 0.257                                     | 0.241                              | 0.238                                    | 0.318                 | 0.230            | 0.308                        |
| 195              | C <sub>5</sub> H <sub>7</sub> SO <sub>6</sub> <sup>-</sup>     | .749**           | .708**             | 0.375                                     | 0.381                              | 0.369                                    | .438*                 | 0.336            | .439*                        |
| 197              | C <sub>5</sub> H <sub>9</sub> SO <sub>6</sub> <sup>-</sup>     | .670**           | .635**             | 0.361                                     | 0.371                              | 0.352                                    | .389*                 | 0.263            | .398*                        |
| <sup>d</sup> 199 | C <sub>4</sub> H <sub>7</sub> SO <sub>7</sub> <sup>-</sup>     | .437*            | .525**             | .524**                                    | .539**                             | .621**                                   | .608**                | 0.366            | .498**                       |
| 199              | C <sub>5</sub> H <sub>11</sub> SO <sub>6</sub> <sup>-</sup>    | .643**           | .595**             | 0.068                                     | 0.090                              | 0.166                                    | 0.246                 | 0.130            | 0.093                        |
| 209              | C <sub>6</sub> H <sub>9</sub> SO <sub>6</sub> <sup>-</sup>     | 0.339            | .402*              | .682**                                    | .713**                             | .658**                                   | .404*                 | .610**           | .474*                        |
| 211              | C <sub>5</sub> H <sub>7</sub> SO <sub>7</sub> <sup>-</sup>     | .633**           | .668**             | .672**                                    | .678**                             | .635**                                   | .556**                | .490*            | .600**                       |
| 213              | C <sub>5</sub> H <sub>9</sub> SO <sub>7</sub> <sup>-</sup>     | .680**           | .685**             | .646**                                    | .634**                             | .568**                                   | .475*                 | .423*            | .502**                       |
| <sup>e</sup> 215 | C <sub>5</sub> H <sub>11</sub> SO <sub>7</sub> <sup>-</sup>    | .753**           | .761**             | .553**                                    | .522**                             | .498**                                   | .446*                 | 0.363            | .443*                        |
| 223              | C <sub>7</sub> H <sub>11</sub> SO <sub>6</sub> <sup>-</sup>    | .685**           | .633**             | 0.202                                     | 0.220                              | 0.262                                    | 0.303                 | 0.247            | 0.307                        |
| 237              | C <sub>7</sub> H <sub>9</sub> SO <sub>7</sub> <sup>-</sup>     | .594**           | .549**             | 0.246                                     | 0.243                              | 0.188                                    | 0.256                 | 0.186            | 0.349                        |
| 239              | C <sub>7</sub> H <sub>11</sub> SO <sub>7</sub> <sup>-</sup>    | .736**           | .668**             | 0.139                                     | 0.140                              | 0.140                                    | 0.272                 | 0.136            | 0.254                        |
| 242              | C <sub>5</sub> H <sub>8</sub> NSO <sub>8</sub> <sup>-</sup>    | 0.149            | 0.053              | -0.008                                    | 0.016                              | -0.015                                   | 0.163                 | 0.109            | 0.386                        |
| 251              | C <sub>9</sub> H <sub>15</sub> SO <sub>6</sub> <sup>-</sup>    | .687**           | .660**             | 0.288                                     | 0.298                              | 0.294                                    | 0.348                 | 0.218            | 0.363                        |
| 253              | C <sub>8</sub> H <sub>13</sub> SO <sub>7</sub> <sup>-</sup>    | .618**           | .587**             | 0.255                                     | 0.262                              | 0.224                                    | 0.236                 | 0.162            | 0.275                        |
| 260              | C <sub>5</sub> H <sub>10</sub> NSO <sub>9</sub> <sup>-</sup>   | .420*            | .420*              | 0.198                                     | 0.205                              | 0.205                                    | 0.232                 | 0.181            | 0.265                        |
| 265              | C <sub>12</sub> H <sub>25</sub> SO <sub>4</sub> <sup>-</sup>   | 0.351            | 0.363              | 0.379                                     | 0.374                              | 0.318                                    | 0.344                 | 0.273            | .460*                        |
| 274              | C <sub>5</sub> H <sub>8</sub> NSO <sub>10</sub> <sup>-</sup>   | 0.212            | 0.173              | 0.167                                     | 0.168                              | 0.081                                    | 0.044                 | 0.108            | 0.213                        |
| 279              | C <sub>10</sub> H <sub>15</sub> SO <sub>7</sub> <sup>-</sup>   | .682**           | .634**             | 0.200                                     | 0.199                              | 0.208                                    | 0.239                 | 0.219            | 0.261                        |
| 281              | C <sub>10</sub> H <sub>17</sub> SO <sub>7</sub> <sup>-</sup>   | .541**           | .495*              | -0.019                                    | -0.038                             | -0.057                                   | 0.103                 | -0.083           | 0.068                        |
| 294              | C <sub>10</sub> H <sub>16</sub> NSO <sub>7</sub> <sup>-</sup>  | -0.227           | -0.283             | -0.189                                    | -0.159                             | -0.208                                   | -0.047                | -0.108           | 0.017                        |
| 296              | C <sub>9</sub> H <sub>14</sub> NSO <sub>8</sub> <sup>-</sup>   | -0.001           | -0.059             | -0.248                                    | -0.244                             | -0.302                                   | -0.096                | -0.287           | 0.023                        |
| 342              | C <sub>10</sub> H <sub>16</sub> NSO <sub>10</sub> <sup>-</sup> | 0.030            | 0.009              | -0.235                                    | -0.240                             | -0.326                                   | -0.106                | -0.383           | -0.039                       |

\*Correlation is significant at the 0.05 level, \*\*Correlation is significant at the 0.01 level, <sup>a</sup>hydroxyacetone sulfate,

<sup>b</sup>glycolic acid sulfate, <sup>c</sup>lactic acid sulfate, <sup>d</sup>2-methylglyceric acid sulfate, <sup>e</sup>methyltetrol sulfate

**Table S3.** Correlations of organosulfates with anthropogenic SOA in Atlanta, GA during August 2015

| <i>m/z</i>       | Chemical formula                                             | Meso-erythritol | 2,3-Dihydroxy-4-oxopentanoic acid | Phthalic acid | Terephthalic acid | Isophthalic acid | 4-Methylphthalic acid | 4-Nitrophenol | 2-Methyl-4-nitrophenol | 4-Methyl-2-nitrophenol | 4-Nitrocatechol | 3-Methyl-6-nitrocatechol | 3-Methyl-5-nitrocatechol |
|------------------|--------------------------------------------------------------|-----------------|-----------------------------------|---------------|-------------------|------------------|-----------------------|---------------|------------------------|------------------------|-----------------|--------------------------|--------------------------|
| n                |                                                              | 26              | 26                                | 26            | 26                | 26               | 26                    | 20            | 8                      | 18                     | 20              | 7                        | 25                       |
| 137              | C <sub>3</sub> H <sub>5</sub> SO <sub>4</sub> <sup>-</sup>   | .674**          | 0.154                             | 0.234         | -0.170            | 0.056            | 0.202                 | -0.203        | .859**                 | 0.081                  | .542*           | -0.202                   | 0.335                    |
| 139              | C <sub>2</sub> H <sub>3</sub> SO <sub>5</sub> <sup>-</sup>   | .539**          | 0.254                             | 0.249         | -0.144            | 0.098            | 0.199                 | 0.115         | .806*                  | 0.464                  | 0.387           | -0.290                   | 0.129                    |
| 151              | C <sub>4</sub> H <sub>7</sub> SO <sub>4</sub> <sup>-</sup>   | .637**          | 0.244                             | 0.311         | -0.151            | 0.198            | 0.268                 | -0.348        | .820*                  | -0.189                 | .559*           | -0.178                   | 0.341                    |
| <sup>a</sup> 153 | C <sub>3</sub> H <sub>5</sub> SO <sub>5</sub> <sup>-</sup>   | .691**          | 0.238                             | 0.316         | -0.106            | 0.208            | 0.298                 | -.483*        | .896**                 | -0.251                 | 0.417           | -0.042                   | 0.328                    |
| 155              | C <sub>3</sub> H <sub>7</sub> SO <sub>5</sub> <sup>-</sup>   | .456*           | 0.182                             | 0.166         | -0.162            | -0.003           | 0.095                 | 0.153         | 0.673                  | .527*                  | .496*           | -0.095                   | 0.127                    |
| <sup>b</sup> 155 | C <sub>2</sub> H <sub>3</sub> SO <sub>6</sub> <sup>-</sup>   | .482*           | 0.376                             | 0.340         | 0.238             | 0.254            | 0.313                 | .445*         | -0.099                 | .540*                  | 0.173           | .927**                   | 0.182                    |
| 165              | C <sub>4</sub> H <sub>5</sub> SO <sub>5</sub> <sup>-</sup>   | .565**          | 0.133                             | 0.112         | -0.201            | -0.006           | 0.081                 | -0.385        | .837**                 | -0.168                 | .537*           | -0.105                   | 0.369                    |
| 167              | C <sub>4</sub> H <sub>7</sub> SO <sub>5</sub> <sup>-</sup>   | .774**          | .403*                             | .461*         | 0.076             | 0.305            | .433*                 | -0.258        | .886**                 | 0.072                  | .508*           | -0.373                   | .413*                    |
| <sup>c</sup> 169 | C <sub>3</sub> H <sub>5</sub> SO <sub>6</sub> <sup>-</sup>   | .663**          | 0.167                             | 0.216         | -0.202            | 0.069            | 0.197                 | -0.327        | .815*                  | -0.066                 | .502*           | -0.394                   | 0.278                    |
| 183              | C <sub>3</sub> H <sub>7</sub> SO <sub>6</sub> <sup>-</sup>   | .634**          | 0.205                             | 0.241         | -0.185            | 0.125            | 0.210                 | -.465*        | .847**                 | -0.223                 | .544*           | -0.264                   | 0.333                    |
| 195              | C <sub>5</sub> H <sub>7</sub> SO <sub>6</sub> <sup>-</sup>   | .719**          | 0.276                             | 0.370         | -0.121            | 0.203            | 0.325                 | -0.165        | .899**                 | 0.152                  | .627**          | -0.561                   | 0.277                    |
| 197              | C <sub>5</sub> H <sub>9</sub> SO <sub>6</sub> <sup>-</sup>   | .649**          | 0.253                             | 0.337         | -0.147            | 0.172            | 0.278                 | -0.001        | .937**                 | 0.292                  | .667**          | -0.442                   | 0.281                    |
| <sup>d</sup> 199 | C <sub>4</sub> H <sub>7</sub> SO <sub>7</sub> <sup>-</sup>   | .621**          | .439*                             | .552**        | 0.133             | 0.349            | .493*                 | .574**        | 0.425                  | .650**                 | 0.372           | -0.299                   | 0.053                    |
| 199              | C <sub>5</sub> H <sub>11</sub> SO <sub>6</sub> <sup>-</sup>  | .542**          | 0.013                             | 0.056         | -0.297            | -0.123           | 0.001                 | -0.079        | 0.695                  | 0.177                  | .588**          | -0.263                   | 0.330                    |
| 209              | C <sub>6</sub> H <sub>9</sub> SO <sub>6</sub> <sup>-</sup>   | .666**          | 0.279                             | .435*         | 0.057             | 0.313            | .413*                 | .534*         | 0.591                  | .637**                 | .487*           | -0.576                   | 0.022                    |
| 211              | C <sub>5</sub> H <sub>7</sub> SO <sub>7</sub> <sup>-</sup>   | .750**          | .534**                            | .583**        | 0.118             | .392*            | .538**                | 0.134         | .816*                  | 0.378                  | 0.386           | -0.369                   | 0.163                    |
| 213              | C <sub>5</sub> H <sub>9</sub> SO <sub>7</sub> <sup>-</sup>   | .693**          | .452*                             | .483*         | 0.047             | 0.347            | .443*                 | -0.052        | 0.658                  | 0.235                  | 0.339           | -0.285                   | 0.153                    |
| <sup>e</sup> 215 | C <sub>5</sub> H <sub>11</sub> SO <sub>7</sub> <sup>-</sup>  | .710**          | .388*                             | .423*         | -0.043            | 0.292            | 0.387                 | -0.282        | .737*                  | 0.006                  | 0.395           | -0.212                   | 0.218                    |
| 223              | C <sub>7</sub> H <sub>11</sub> SO <sub>6</sub> <sup>-</sup>  | .634**          | 0.138                             | 0.226         | -0.222            | 0.045            | 0.174                 | -0.192        | .946**                 | 0.085                  | .716**          | -0.367                   | 0.330                    |
| 237              | C <sub>7</sub> H <sub>9</sub> SO <sub>7</sub> <sup>-</sup>   | .516**          | 0.128                             | 0.253         | -0.135            | 0.190            | 0.226                 | -0.291        | .816*                  | -0.103                 | .609**          | -0.112                   | .419*                    |
| 239              | C <sub>7</sub> H <sub>11</sub> SO <sub>7</sub> <sup>-</sup>  | .567**          | 0.177                             | 0.175         | -0.207            | 0.046            | 0.131                 | -0.418        | .812*                  | -0.193                 | .553*           | -0.204                   | 0.389                    |
| 242              | C <sub>5</sub> H <sub>8</sub> NSO <sub>8</sub> <sup>-</sup>  | 0.146           | 0.188                             | 0.292         | -0.045            | 0.242            | 0.270                 | 0.342         | .713*                  | .694**                 | -0.010          | -0.214                   | -0.150                   |
| 251              | C <sub>9</sub> H <sub>15</sub> SO <sub>6</sub> <sup>-</sup>  | .631**          | 0.166                             | 0.281         | -0.196            | 0.141            | 0.229                 | -0.297        | .933**                 | -0.057                 | .686**          | -0.382                   | 0.367                    |
| 253              | C <sub>8</sub> H <sub>13</sub> SO <sub>7</sub> <sup>-</sup>  | .588**          | 0.173                             | 0.186         | -0.174            | 0.040            | 0.137                 | -0.198        | .853**                 | 0.037                  | .689**          | -0.172                   | .406*                    |
| 260              | C <sub>5</sub> H <sub>10</sub> NSO <sub>9</sub> <sup>-</sup> | .498**          | 0.108                             | 0.231         | -0.200            | 0.062            | 0.195                 | -0.010        | .923**                 | 0.253                  | .581**          | -0.378                   | 0.246                    |
| 265              | C <sub>12</sub> H <sub>25</sub> SO <sub>4</sub> <sup>-</sup> | .426*           | .408*                             | .438*         | -0.008            | 0.292            | .409*                 | 0.074         | .840**                 | 0.180                  | .483*           | -0.356                   | 0.092                    |

|     |                                                                |        |        |        |        |        |        |        |        |        |        |        |        |
|-----|----------------------------------------------------------------|--------|--------|--------|--------|--------|--------|--------|--------|--------|--------|--------|--------|
| 274 | C <sub>5</sub> H <sub>8</sub> NSO <sub>10</sub> <sup>-</sup>   | 0.277  | 0.125  | 0.155  | -0.100 | 0.061  | 0.136  | 0.018  | 0.679  | 0.295  | 0.289  | -0.307 | 0.152  |
| 279 | C <sub>10</sub> H <sub>15</sub> SO <sub>7</sub> <sup>-</sup>   | .632** | 0.134  | 0.168  | -0.198 | 0.024  | 0.136  | -0.263 | .830*  | 0.003  | .611** | -0.226 | 0.356  |
| 281 | C <sub>10</sub> H <sub>17</sub> SO <sub>7</sub> <sup>-</sup>   | 0.339  | -0.031 | -0.009 | -0.267 | -0.048 | -0.038 | -.535* | .781*  | -0.388 | .552*  | 0.054  | .437*  |
| 294 | C <sub>10</sub> H <sub>16</sub> NSO <sub>7</sub> <sup>-</sup>  | -0.175 | -0.078 | -0.030 | -0.097 | 0.031  | -0.045 | .591** | -0.111 | 0.341  | 0.201  | -0.013 | -0.162 |
| 296 | C <sub>9</sub> H <sub>14</sub> NSO <sub>8</sub> <sup>-</sup>   | -0.080 | -0.245 | -0.092 | -0.251 | -0.097 | -0.130 | 0.044  | 0.346  | -0.056 | .572** | -0.275 | 0.128  |
| 342 | C <sub>10</sub> H <sub>16</sub> NSO <sub>10</sub> <sup>-</sup> | -0.099 | 0.027  | -0.142 | 0.017  | -0.003 | -0.151 | -0.255 | 0.161  | -0.273 | 0.129  | 0.543  | .436*  |

\*Correlation is significant at the 0.05 level, \*\*Correlation is significant at the 0.01 level, <sup>a</sup>hydroxyacetone sulfate, <sup>b</sup>glycolic acid sulfate, <sup>c</sup>lactic acid sulfate, <sup>d</sup>2-methylglyceric acid sulfate, <sup>e</sup>methyltetrol sulfate

**Table S4.** Correlations of organosulfates (n = 26) with sulfate and nitrate in PM<sub>2.5</sub>, ozone, NO<sub>x</sub> (NO and NO<sub>2</sub>), and solar radiation in Atlanta, GA during August 2015.

| <i>m/z</i>       | Chemical formula                                               | SO <sub>4</sub> <sup>2-</sup> | O <sub>3</sub> | NO      | NO <sub>2</sub> | Solar radiation |
|------------------|----------------------------------------------------------------|-------------------------------|----------------|---------|-----------------|-----------------|
| 137              | C <sub>3</sub> H <sub>5</sub> SO <sub>4</sub> <sup>-</sup>     | .410*                         | .638**         | -.391*  | 0.002           | 0.259           |
| 139              | C <sub>2</sub> H <sub>3</sub> SO <sub>5</sub> <sup>-</sup>     | .544**                        | .606**         | -.518** | -0.214          | 0.172           |
| 151              | C <sub>4</sub> H <sub>7</sub> SO <sub>4</sub> <sup>-</sup>     | 0.250                         | .644**         | -0.258  | 0.053           | 0.283           |
| <sup>a</sup> 153 | C <sub>3</sub> H <sub>5</sub> SO <sub>5</sub> <sup>-</sup>     | 0.178                         | .527**         | -0.238  | 0.106           | 0.358           |
| 155              | C <sub>3</sub> H <sub>7</sub> SO <sub>5</sub> <sup>-</sup>     | .606**                        | .445*          | -.473*  | -0.289          | 0.240           |
| <sup>b</sup> 155 | C <sub>2</sub> H <sub>3</sub> SO <sub>6</sub> <sup>-</sup>     | 0.346                         | 0.267          | -0.178  | 0.132           | 0.008           |
| 165              | C <sub>4</sub> H <sub>5</sub> SO <sub>5</sub> <sup>-</sup>     | 0.239                         | .572**         | -0.276  | -0.062          | 0.360           |
| 167              | C <sub>4</sub> H <sub>7</sub> SO <sub>5</sub> <sup>-</sup>     | .484*                         | .710**         | -0.368  | 0.071           | 0.254           |
| <sup>c</sup> 169 | C <sub>3</sub> H <sub>5</sub> SO <sub>6</sub> <sup>-</sup>     | 0.361                         | .600**         | -0.362  | 0.024           | 0.349           |
| 183              | C <sub>4</sub> H <sub>7</sub> SO <sub>6</sub> <sup>-</sup>     | 0.222                         | .615**         | -0.317  | 0.037           | 0.364           |
| 195              | C <sub>3</sub> H <sub>7</sub> SO <sub>6</sub> <sup>-</sup>     | .389*                         | .764**         | -.522** | 0.035           | 0.371           |
| 197              | C <sub>3</sub> H <sub>9</sub> SO <sub>6</sub> <sup>-</sup>     | .401*                         | .802**         | -.526** | -0.005          | 0.371           |
| <sup>d</sup> 199 | C <sub>4</sub> H <sub>7</sub> SO <sub>7</sub> <sup>-</sup>     | 0.213                         | .533**         | -.438*  | 0.083           | 0.282           |
| 199              | C <sub>3</sub> H <sub>11</sub> SO <sub>6</sub> <sup>-</sup>    | 0.259                         | .708**         | -.478*  | -0.229          | 0.317           |
| 209              | C <sub>6</sub> H <sub>9</sub> SO <sub>6</sub> <sup>-</sup>     | .422*                         | .697**         | -.475*  | 0.144           | 0.326           |
| 211              | C <sub>3</sub> H <sub>7</sub> SO <sub>7</sub> <sup>-</sup>     | .429*                         | .616**         | -.451*  | 0.034           | 0.135           |
| 213              | C <sub>3</sub> H <sub>9</sub> SO <sub>7</sub> <sup>-</sup>     | 0.296                         | .618**         | -.438*  | -0.052          | 0.186           |
| <sup>e</sup> 215 | C <sub>3</sub> H <sub>11</sub> SO <sub>7</sub> <sup>-</sup>    | 0.224                         | .618**         | -0.369  | 0.013           | 0.271           |
| 223              | C <sub>7</sub> H <sub>11</sub> SO <sub>6</sub> <sup>-</sup>    | .413*                         | .706**         | -.434*  | -0.061          | .393*           |
| 237              | C <sub>7</sub> H <sub>9</sub> SO <sub>7</sub> <sup>-</sup>     | 0.291                         | .636**         | -0.179  | 0.138           | 0.339           |
| 239              | C <sub>7</sub> H <sub>11</sub> SO <sub>7</sub> <sup>-</sup>    | 0.284                         | .570**         | -0.296  | -0.064          | 0.279           |
| 242              | C <sub>5</sub> H <sub>8</sub> NSO <sub>8</sub> <sup>-</sup>    | .486*                         | 0.201          | -0.320  | -0.121          | 0.077           |
| 251              | C <sub>9</sub> H <sub>15</sub> SO <sub>6</sub> <sup>-</sup>    | 0.350                         | .705**         | -0.374  | 0.052           | 0.343           |
| 253              | C <sub>8</sub> H <sub>13</sub> SO <sub>7</sub> <sup>-</sup>    | .429*                         | .621**         | -0.329  | 0.005           | 0.240           |
| 260              | C <sub>5</sub> H <sub>10</sub> NSO <sub>9</sub> <sup>-</sup>   | .443*                         | .689**         | -.446*  | 0.068           | 0.203           |
| 265              | C <sub>12</sub> H <sub>25</sub> SO <sub>4</sub> <sup>-</sup>   | 0.359                         | .398*          | -0.213  | 0.242           | 0.188           |
| 274              | C <sub>5</sub> H <sub>8</sub> NSO <sub>10</sub> <sup>-</sup>   | .498**                        | .449*          | -0.348  | 0.031           | 0.016           |
| 279              | C <sub>10</sub> H <sub>15</sub> SO <sub>7</sub> <sup>-</sup>   | .392*                         | .570**         | -0.356  | 0.070           | 0.302           |
| 281              | C <sub>10</sub> H <sub>17</sub> SO <sub>7</sub> <sup>-</sup>   | 0.065                         | 0.359          | 0.029   | 0.154           | 0.222           |
| 294              | C <sub>10</sub> H <sub>16</sub> NSO <sub>7</sub> <sup>-</sup>  | -0.010                        | -0.055         | -0.020  | 0.213           | 0.261           |
| 296              | C <sub>9</sub> H <sub>14</sub> NSO <sub>8</sub> <sup>-</sup>   | -0.016                        | 0.101          | -0.100  | 0.242           | .418*           |
| 342              | C <sub>10</sub> H <sub>16</sub> NSO <sub>10</sub> <sup>-</sup> | -0.023                        | -0.199         | .401*   | 0.234           | 0.062           |

\*Correlation is significant at the 0.05 level, \*\*Correlation is significant at the 0.01 level, <sup>a</sup>hydroxyacetone sulfate,

<sup>b</sup>glycolic acid sulfate, <sup>c</sup>lactic acid sulfate, <sup>d</sup>2-methylglyceric acid sulfate, <sup>e</sup>methyltetrol sulfate
