# Supplementary material for: Organosulfates in Atlanta, Georgia: anthropogenic influences on biogenic secondary organic aerosol formation
Source: Copernicus journal article supplement (doi:10.5194/acp-19-3191-2019), 2019-03-12
Supplement: Supplementary file 1 [file Table S5.xlsx]

## Sheet: Organosulfates
Table S5. The ambient concentrations and uncertainties of the 32 organosulfates measured in the PM2.5 samples collected from Atlanta, GA from 29 July to 27 August 2015 using HILIC-MS/MS. Samples from 29 July, 03, 11, and 19 August were not analysed (NA) for organosulfates as the filters were used for a different purpose. Hydroxyacetone sulfate1 and glycolic acid sulfate2 were quantified against a…
Date	C3H5SO4- (m/z 137)	Unc		C2H3SO5- (m/z 139)	Unc		C4H7SO4- (m/z 151)	Unc		C3H5SO5- (m/z 153)1	Unc		C3H7SO5- (m/z 155)	Unc		C2H3SO6- (m/z 155)2	Unc		C4H5SO5- (m/z 165)	Unc		C4H7SO5- (m/z 167)	Unc		C3H5SO6- (m/z 169)3	Unc		C4H7SO6- (m/z 183)	Unc		C5H7SO6- (m/z 195)	Unc		C5H9SO6- (m/z 197)	Unc		C4H7SO7- (m/z 199)	Unc		C5H11SO6- (m/z 199)	Unc		C6H9SO6- (m/z 209)	Unc		C5H7SO7- (m/z 211)	Unc		C5H9SO7- (m/z 213)
	ng/m3	ng/m3		ng/m3	ng/m3		ng/m3	ng/m3		ng/m3	ng/m3		ng/m3	ng/m3		ng/m3	ng/m3		ng/m3	ng/m3		ng/m3	ng/m3		ng/m3	ng/m3		ng/m3	ng/m3		ng/m3	ng/m3		ng/m3	ng/m3		ng/m3	ng/m3		ng/m3	ng/m3		ng/m3	ng/m3		ng/m3	ng/m3		ng/m3
2015-07-29	NA			NA			NA			NA			NA			NA			NA			NA			NA			NA			NA			NA			NA			NA			NA			NA			NA
2015-07-30	3.48254	1.04476		4.04825	1.21448		7.03688	2.11107		19.0072	3.07736		2.58649	0.775948		206.878	18.3483		2.6117	0.78351		7.35867	2.2076		59.8426	5.12949		39.2483	11.7745		13.8105	4.14314		20.8612	6.25837		156.545	46.9636		6.78342	2.03503		21.6744	6.50231		371.362	111.409		350.275
2015-07-31	1.7598	0.52794		2.76255	0.828764		3.55734	1.0672		7.6939	1.2728		1.00892	0.302676		47.5108	4.21923		1.91454	0.574361		5.94936	1.78481		33.8427	2.91689		22.9808	6.89424		9.33072	2.79922		15.3249	4.59747		63.41	19.023		7.98352	2.39505		24.1915	7.25745		230.526	69.1577		195.723
2015-08-01	1.70433	0.5113		2.20734	0.662201		2.71624	0.814871		10.3273	1.70889		1.19785	0.359356		34.5483	3.08224		2.06378	0.619134		4.63311	1.38993		25.0027	2.2194		18.4068	5.52205		7.448	2.2344		13.9511	4.18533		155.358	46.6075		10.0394	3.01181		10.0648	3.01945		175.893	52.768		111.936
2015-08-02	3.17236	0.951707		3.1897	0.95691		3.84409	1.15323		20.2948	3.26846		2.57344	0.772031		63.8771	5.65914		4.89503	1.46851		6.84894	2.05468		93.1667	7.9258		45.9711	13.7913		13.773	4.1319		20.2693	6.08079		66.4576	19.9373		20.9568	6.28704		16.0166	4.80499		171.113	51.3339		154.139
2015-08-03	NA			NA			NA			NA			NA			NA			NA			NA			NA			NA			NA			NA			NA			NA			NA			NA			NA
2015-08-04	2.25942	0.677825		2.9407	0.882211		5.43972	1.63192		19.4492	3.13995		2.29207	0.687622		69.5522	6.16292		4.5396	1.36188		5.80284	1.74085		69.9943	5.96969		51.4587	15.4376		16.1491	4.84472		23.5551	7.06653		70.3168	21.095		16.4154	4.92461		14.6461	4.39384		199.975	59.9924		212.505
2015-08-05	2.45793	0.73738		3.78343	1.13503		4.6582	1.39746		20.6185	3.31578		3.05548	0.916644		74.061	6.55895		5.08646	1.52594		6.05447	1.81634		82.2003	6.99152		49.9049	14.9715		13.6164	4.08491		22.5403	6.76209		64.7117	19.4135		14.2111	4.26333		9.34832	2.8045		247.34	74.202		240.375
2016-08-06	1.7078	0.512339		2.63611	0.790833		1.85975	0.557925		12.4042	1.99295		2.48848	0.746543		41.8629	3.70711		1.44495	0.433486		3.24996	0.974988		44.5064	3.78459		17.9974	5.39923		6.58013	1.97404		8.72565	2.61769		17.7613	5.3284		4.72128	1.41639		5.42103	1.62631		88.3784	26.5135		61.0429
2015-08-07	1.11403	0.334208		1.48931	0.446792		0.652004	0.195601		7.03105	1.14131		1.54241	0.462723		19.236	1.7077		0.648911	0.194673		3.04875	0.914626		29.1462	2.48961		11.9961	3.59882		4.87209	1.46163		7.65575	2.29672		10.2007	3.0602		3.20487	0.961462		6.32903	1.89871		59.1708	17.7512		28.5364
2015-08-08	1.92926	0.578777		1.54927	0.46478		2.33295	0.699886		11.4948	1.85873		0.630457	0.189137		39.208	3.4753		1.76658	0.529974		4.80535	1.4416		48.7775	4.15823		27.1399	8.14196		8.43328	2.52998		14.2494	4.27483		26.6698	8.00094		7.42528	2.22758		6.97351	2.09205		104.217	31.2651		57.3098
2015-08-09	2.50088	0.750264		2.25941	0.677824		6.13463	1.84039		20.7133	3.3354		1.50744	0.452232		56.5827	5.01397		3.82677	1.14803		6.41856	1.92557		64.1407	5.46665		45.6001	13.68		9.47868	2.8436		18.6972	5.60915		39.7967	11.939		11.7702	3.53105		9.38417	2.81525		143.056	42.9169		138.653
2015-08-10	2.14519	0.643558		1.97814	0.593441		3.71704	1.11511		13.6719	2.20673		2.02604	0.607811		39.1399	3.46972		1.88631	0.565893		3.56562	1.06969		44.3741	3.78754		33.0801	9.92402		7.2269	2.16807		12.5058	3.75173		29.4517	8.8355		9.56301	2.8689		5.65056	1.69517		118.81	35.643		100.303
2015-08-11	NA			NA			NA			NA			NA			NA			NA			NA			NA			NA			NA			NA			NA			NA			NA			NA			NA
2015-08-12	1.38822	0.416465		1.59128	0.477383		2.71298	0.813895		8.18916	1.33446		1.72595	0.517784		33.2405	2.94769		1.71366	0.514097		4.26038	1.27811		47.8732	4.08143		22.3465	6.70394		8.05654	2.41696		12.2043	3.66128		26.3071	7.89212		4.86899	1.4607		12.1534	3.64602		65.2308	19.5692		60.9001
2015-08-13	2.41441	0.724324		2.35311	0.705934		2.61095	0.783285		14.3641	2.32324		1.61537	0.48461		47.2578	4.18936		3.15859	0.947578		6.46943	1.94083		66.6091	5.67542		35.8702	10.7611		12.5304	3.75912		17.2824	5.18473		36.2673	10.8802		11.6443	3.4933		10.6259	3.18776		161.933	48.5799		100.479
2015-08-14	1.60984	0.482951		1.64819	0.494456		2.95811	0.887433		12.5145	2.02915		2.25967	0.677901		42.2756	3.74886		3.46392	1.03917		3.73011	1.11903		55.1485	4.70542		36.8105	11.0432		9.76813	2.93044		14.1437	4.2431		33.6454	10.0936		11.5676	3.47027		10.004	3.0012		100.799	30.2396		116.268
2015-08-15	2.86035	0.858106		3.28323	0.98497		4.28148	1.28445		9.07073	1.47594		2.68461	0.805382		52.4778	4.64925		3.38762	1.01629		5.83896	1.75169		32.0506	2.74781		32.5613	9.76838		12.7607	3.82822		19.1833	5.75498		49.4817	14.8445		17.7312	5.31937		10.2333	3.07		139.674	41.9023		218.205
2015-08-16	1.24691	0.374074		1.81611	0.544832		2.16022	0.648067		6.10724	0.995236		0.819363	0.245809		38.0576	3.37158		1.01387	0.30416		2.47112	0.741336		19.5815	1.68412		14.1645	4.24936		3.33917	1.00175		9.27277	2.78183		25.7462	7.72385		10.8199	3.24598		4.45698	1.33709		116.298	34.8895		123.27
2015-08-17	0.248202	0.0744605		0.548658	0.164597		0.0669943	0.0200983		2.0827	0.41753		0.278908	0.0836723		9.28829	0.841675		0.718672	0.215602		0.735201	0.22056		3.63528	0.48575		4.58904	1.37671		0.522353	0.156706		1.91689	0.575067		11.3537	3.40612		0.853016	0.255905		0.975697	0.292709		16.3043	4.89129		25.7135
2015-08-18	0.637601	0.19128		0.955998	0.2868		0.145419	0.0436256		1.24679	0.23533		0.493302	0.147991		18.8808	1.67386		0.481505	0.144451		1.12514	0.337541		6.33964	0.569578		4.05752	1.21725		0.911113	0.273334		2.83637	0.85091		11.5041	3.45122		1.95896	0.587689		1.74151	0.522454		30.2876	9.08628		13.1135
2015-08-19	NA			NA			NA			NA			NA			NA			NA			NA			NA			NA			NA			NA			NA			NA			NA			NA			NA
2015-08-20	0.818071	0.245421		1.55586	0.466758		0.347365	0.104209		2.87507	0.492799		1.08731	0.326192		64.4421	5.70628		0.90404	0.271212		2.89049	0.867146		10.5402	0.932328		8.10521	2.43156		1.81307	0.54392		5.38727	1.61618		17.2957	5.18872		1.65393	0.49618		2.56679	0.770038		58.3312	17.4994		44.3938
2015-08-21	1.35121	0.405362		1.622	0.486601		0.84083	0.252249		5.85782	0.955606		0.757344	0.227203		72.5827	6.42681		0.729032	0.21871		3.21893	0.96568		15.421	1.33585		6.86717	2.06015		3.4151	1.02453		7.16688	2.15006		32.971	9.8913		2.85466	0.856397		7.5768	2.27304		77.3816	23.2145		55.9307
2015-08-22	1.21733	0.3652		2.02415	0.607244		1.90406	0.571218		5.97072	0.973406		0.754656	0.226397		69.5136	6.15518		0.958506	0.287552		2.91075	0.873226		15.2436	1.32109		14.4063	4.3219		3.32707	0.998121		9.5303	2.85909		45.5051	13.6515		2.99443	0.898329		4.66704	1.40011		69.6162	20.8849		109.72
2015-08-23	0.847431	0.254229		2.44492	0.733475		0.665921	0.199776		5.59373	0.914013		0.583296	0.174989		57.5836	5.09931		0.640311	0.192093		2.53158	0.759475		11.5284	1.01381		8.81261	2.64378		1.6417	0.492509		8.7192	2.61576		32.0819	9.62458		5.10182	1.53055		3.70608	1.11182		68.3716	20.5115		62.3001
2015-08-24	1.79754	0.539262		2.17256	0.651767		0.903919	0.271176		8.0404	1.31342		3.14178	0.942535		80.543	7.13256		1.05174	0.315522		3.05915	0.917746		26.021	2.24159		15.5009	4.65028		4.58999	1.377		12.0582	3.61746		53.3154	15.9946		4.28521	1.28556		12.755	3.8265		81.1195	24.3359		85.7577
2015-08-25	0.972261	0.291678		1.66682	0.500045		1.16755	0.350265		3.00228	0.512764		0.489466	0.14684		46.7281	4.13869		0.492989	0.147897		1.67966	0.503898		13.3874	1.16729		3.74627	1.12388		3.97041	1.19112		8.49038	2.54711		57.1865	17.156		3.71724	1.11517		16.0889	4.82667		58.1007	17.4302		32.6714
2015-08-26	2.73982	0.821945		4.99804	1.49941		3.77721	1.13316		5.9922	0.993003		1.82584	0.547751		47.3894	4.19917		0.934766	0.28043		4.22653	1.26796		35.0451	2.99996		17.7303	5.31908		9.80777	2.94233		21.7692	6.53075		145.325	43.5976		11.3911	3.41734		22.0184	6.60551		234.985	70.4954		124.298
2015-08-27	3.05327	0.915981		4.45014	1.33504		4.49563	1.34869		8.18483	1.34712		3.31551	0.994652		148.538	13.1515		2.39347	0.71804		5.6346	1.69038		44.7528	3.82797		17.9746	5.39237		9.1998	2.75994		17.747	5.32409		98.7661	29.6298		13.5523	4.0657		15.8575	4.75726		208.032	62.4097		148.594
[truncated: 31 more columns]
