# Supplementary material for: Organosulfates in Atlanta, Georgia: anthropogenic influences on biogenic secondary organic aerosol formation
Source: Copernicus journal article supplement (doi:10.5194/acp-19-3191-2019), 2019-03-12
Supplement: Supplementary file 2 [file acp-19-3191-2019-supplement.zip]

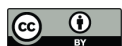

*Supplement of*

## **Organosulfates in Atlanta, Georgia: anthropogenic influences on biogenic secondary organic aerosol formation**

**Anusha Priyadarshani Silva Hettiyadura et al.**

*Correspondence to:* Elizabeth A. Stone ([betsy-stone@uiowa.edu](mailto:betsy-stone@uiowa.edu))

- [acp-19-3191-2019-supplement-title-page.pdf](#)
- [Table S5.xlsx](#)
- [Tables S1-S4.pdf](#)

The copyright of individual parts of the supplement might differ from the CC BY 4.0 License.
